# Supplementary material for: Integrating multiple omics data for the discovery of potential Beclin-1 interactions in breast cancer
Source: Royal Society of Chemistry journal article supplement (doi:10.1039/c6mb00653a), 2017-01-27
Supplement: c6mb00653a1.pdf [file c6mb00653a1.pdf]

Supplementary table 1: The gene nodes overlapped among four subnets for pairwise compare

| NET       | Gene name | Cancer subtype | Omics       | Target of the gene | The parameter of the interaction |
|-----------|-----------|----------------|-------------|--------------------|----------------------------------|
| HER2-TNBC | ZNF441    | HER2           | Methylation | C1orf112_r         | 0.943489                         |
|           |           | TNBC           | mRNA        | BCL2L1_m           | -0.04702                         |
| HER2-LUA  | FUT3      | HER2           | Methylation | C1orf112_r         | -0.07164                         |
|           |           | LUA            | mRNA        | GSR_m              | -0.784                           |
| HER2-LUB  | FUT3      | HER2           | Methylation | C1orf112_r         | -0.07164                         |
|           |           | LUB            | mRNA        | GSR_m              | -0.73699                         |
| TNBC-LUA  | UBXN10    | TNBC           | mRNA        | BCL2L1_m           | -0.25215                         |
|           |           | LUA            | mRNA        | TMEM26_m           | -0.00677                         |
|           | C2orf54   | TNBC           | mRNA        | ATP5E_m            | 0.132613                         |
|           | LUA       | mRNA           | GSR_m       | -0.12975           |                                  |
| TNBC-LUB  | FBXO36    | TNBC           | mRNA        | BCL2L1_m           | -0.19961                         |
|           |           | LUA            | mRNA        | TMEM26_m           | -0.00614                         |
|           | C2orf54   | TNBC           | mRNA        | ATP5E_m            | 0.132613                         |
|           | LUB       | mRNA           | GSR_m       | -0.26863           |                                  |
|           | FBXO36    | TNBC           | mRNA        | BCL2L1_m           | -0.19961                         |
|           |           | LUB            | mRNA        | TMEM26_m           | -0.00602                         |
|           | ACADSB    | LUA            | mRNA        | GSR_m              | 0.534461                         |
|           |           | LUB            | mRNA        | GSR_m              | 0.532843                         |
|           | ACSL1     | LUA            | mRNA        | TMEM26_m           | 0.335593                         |
|           |           | LUB            | mRNA        | TMEM26_m           | 0.321381                         |
|           | ACTB      | LUA            | mRNA        | GSR_m              | -0.06638                         |
|           |           | LUB            | mRNA        | GSR_m              | -0.07303                         |
|           | AFF3      | LUA            | mRNA        | GSR_m              | 0.291915                         |
|           |           | LUB            | mRNA        | GSR_m              | 0.346341                         |
| AFTPH     | LUA       | mRNA           | TMEM26_m    | -0.02386           |                                  |
|           | LUB       | mRNA           | TMEM26_m    | -0.02123           |                                  |
| AIM2      | LUA       | mRNA           | TMEM26_m    | 0.087064           |                                  |
|           | LUB       | mRNA           | TMEM26_m    | 0.072297           |                                  |
| AMFR      | LUA       | mRNA           | GSR_m       | 0.015268           |                                  |
|           | LUB       | mRNA           | GSR_m       | 0.068691           |                                  |
| AP1AR     | LUA       | mRNA           | TMEM26_m    | -0.07107           |                                  |
|           | LUB       | mRNA           | TMEM26_m    | -0.06707           |                                  |
| LUA-LUB   | ARSG      | LUA            | mRNA        | GSR_m              | 0.736897                         |
|           |           | LUB            | mRNA        | GSR_m              | 0.691184                         |
|           | ASB16     | LUA            | mRNA        | GSR_m              | 0.287331                         |
|           |           | LUB            | mRNA        | GSR_m              | 0.361801                         |
|           | ATP13A5   | LUA            | mRNA        | GSR_m              | -0.4153                          |
|           |           | LUB            | mRNA        | GSR_m              | -0.43952                         |
|           | B3GNT3    | LUA            | mRNA        | GSR_m              | -0.32381                         |
|           |           | LUB            | mRNA        | GSR_m              | -0.01339                         |
|           | BCL2      | LUA            | mRNA        | GSR_m              | 0.585404                         |
|           |           | LUB            | mRNA        | GSR_m              | 0.655829                         |
|           | BTRC      | LUA            | mRNA        | GSR_m              | 0.319118                         |
|           |           | LUB            | mRNA        | GSR_m              | 0.315406                         |
|           | C15orf39  | LUA            | mRNA        | TMEM26_m           | 0.004311                         |
|           |           | LUB            | mRNA        | TMEM26_m           | 0.014483                         |
| C16orf46  | LUA       | mRNA           | TMEM26_m    | -0.01849           |                                  |
|           | LUB       | mRNA           | TMEM26_m    | -0.02404           |                                  |
| C1orf173  | LUA       | mRNA           | TMEM26_m    | -0.28602           |                                  |

|              |     |      |          |          |
|--------------|-----|------|----------|----------|
|              | LUB | mRNA | TMEM26_m | -0.30349 |
| C2orf54      | LUA | mRNA | GSR_m    | -0.12975 |
|              | LUB | mRNA | GSR_m    | -0.26863 |
| C6orf211     | LUA | mRNA | GSR_m    | 0.150985 |
|              | LUB | mRNA | GSR_m    | 0.219634 |
| CBR3         | LUA | mRNA | TMEM26_m | 0.064463 |
|              | LUB | mRNA | TMEM26_m | 0.081144 |
| CCDC30       | LUA | mRNA | TMEM26_m | -0.01254 |
|              | LUB | mRNA | TMEM26_m | -0.02141 |
| CCND1        | LUA | mRNA | GSR_m    | 0.233932 |
|              | LUB | mRNA | GSR_m    | 0.224404 |
| CIB2         | LUA | mRNA | GSR_m    | -0.20502 |
|              | LUB | mRNA | GSR_m    | -0.02265 |
| CLCA2        | LUA | mRNA | GSR_m    | -1.606   |
|              | LUB | mRNA | GSR_m    | -1.60462 |
| CNTD1        | LUA | mRNA | GSR_m    | 0.049044 |
|              | LUB | mRNA | GSR_m    | 0.071867 |
| CRYZ         | LUA | mRNA | TMEM26_m | -0.09399 |
|              | LUB | mRNA | TMEM26_m | -0.0929  |
| CSRP2        | LUA | mRNA | GSR_m    | -0.06381 |
|              | LUB | mRNA | GSR_m    | -0.14012 |
| CST9         | LUA | mRNA | GSR_m    | 1.114511 |
|              | LUB | mRNA | GSR_m    | 1.191836 |
| DBNDD2       | LUA | mRNA | GSR_m    | 0.328272 |
|              | LUB | mRNA | GSR_m    | 0.314808 |
| DDIT4        | LUA | mRNA | GSR_m    | -0.39314 |
|              | LUB | mRNA | GSR_m    | -0.49399 |
| ELP2         | LUA | mRNA | GSR_m    | 0.141806 |
|              | LUB | mRNA | GSR_m    | 0.18384  |
| ENO1         | LUA | mRNA | GSR_m    | -0.02099 |
|              | LUB | mRNA | GSR_m    | -0.06015 |
| FAM134A      | LUA | mRNA | GSR_m    | 0.07237  |
|              | LUB | mRNA | GSR_m    | 0.081694 |
| FAM196A      | LUA | mRNA | GSR_m    | 1.077994 |
|              | LUB | mRNA | GSR_m    | 1.220531 |
| FBXO36       | LUA | mRNA | TMEM26_m | -0.00614 |
|              | LUB | mRNA | TMEM26_m | -0.00602 |
| FLJ35390     | LUA | mRNA | GSR_m    | 0.273765 |
|              | LUB | mRNA | GSR_m    | 0.273878 |
| FUT3         | LUA | mRNA | GSR_m    | -0.78401 |
|              | LUB | mRNA | GSR_m    | -0.73699 |
| IGF1R        | LUA | mRNA | GSR_m    | 0.242255 |
|              | LUB | mRNA | GSR_m    | 0.350143 |
| IQCH         | LUA | mRNA | TMEM26_m | -0.0666  |
|              | LUB | mRNA | TMEM26_m | -0.02864 |
| KCNG1        | LUA | mRNA | TMEM26_m | 0.034232 |
|              | LUB | mRNA | TMEM26_m | 0.005442 |
| KDM4B        | LUA | mRNA | TMEM26_m | -0.05832 |
|              | LUB | mRNA | TMEM26_m | -0.08003 |
| LOC100190938 | LUA | mRNA | GSR_m    | 0.425167 |
|              | LUB | mRNA | GSR_m    | 0.454234 |
| LOC150622    | LUA | mRNA | GSR_m    | -1.30398 |

|         |     |      |          |          |
|---------|-----|------|----------|----------|
|         | LUB | mRNA | GSR_m    | -1.30535 |
| LRRC48  | LUA | mRNA | TMEM26_m | -0.04016 |
|         | LUB | mRNA | TMEM26_m | -0.02379 |
| LYPD6B  | LUA | mRNA | GSR_m    | 0.4686   |
|         | LUB | mRNA | GSR_m    | 0.516422 |
| LZTFL1  | LUA | mRNA | TMEM26_m | -0.01555 |
|         | LUB | mRNA | TMEM26_m | -0.0053  |
| MAP3K6  | LUA | mRNA | GSR_m    | -0.17137 |
|         | LUB | mRNA | GSR_m    | -0.2332  |
| MARCO   | LUA | mRNA | TMEM26_m | 0.049862 |
|         | LUB | mRNA | TMEM26_m | 0.017425 |
| MRPS30  | LUA | mRNA | GSR_m    | 0.048612 |
|         | LUB | mRNA | GSR_m    | 0.008718 |
| MYB     | LUA | mRNA | TMEM26_m | -0.23266 |
|         | LUB | mRNA | TMEM26_m | -0.25012 |
| NKAIN1  | LUA | mRNA | GSR_m    | 1.686245 |
|         | LUB | mRNA | GSR_m    | 1.864267 |
| NLK     | LUA | mRNA | GSR_m    | 0.148825 |
|         | LUB | mRNA | GSR_m    | 0.153089 |
| NMNAT3  | LUA | mRNA | GSR_m    | 0.162266 |
|         | LUB | mRNA | GSR_m    | 0.110776 |
| NT5DC2  | LUA | mRNA | GSR_m    | -0.35199 |
|         | LUB | mRNA | GSR_m    | -0.38072 |
| NXNL2   | LUA | mRNA | TMEM26_m | -0.17253 |
|         | LUB | mRNA | TMEM26_m | -0.06379 |
| NXPH3   | LUA | mRNA | GSR_m    | 0.217581 |
|         | LUB | mRNA | GSR_m    | 0.094851 |
| PARD6B  | LUA | mRNA | GSR_m    | 0.570322 |
|         | LUB | mRNA | GSR_m    | 0.611355 |
| PCBP3   | LUA | mRNA | TMEM26_m | 0.018622 |
|         | LUB | mRNA | TMEM26_m | 0.023082 |
| PCSK6   | LUA | mRNA | GSR_m    | 0.987837 |
|         | LUB | mRNA | GSR_m    | 0.881802 |
| PKIB    | LUA | mRNA | TMEM26_m | -0.04846 |
|         | LUB | mRNA | TMEM26_m | -0.0494  |
| PSMB9   | LUA | mRNA | TMEM26_m | 0.022845 |
|         | LUB | mRNA | TMEM26_m | 0.017774 |
| PTGER3  | LUA | mRNA | TMEM26_m | -0.11904 |
|         | LUB | mRNA | TMEM26_m | -0.10137 |
| PVRL1   | LUA | mRNA | GSR_m    | -0.12553 |
|         | LUB | mRNA | GSR_m    | -0.20021 |
| RABEP1  | LUA | mRNA | TMEM26_m | -0.02382 |
|         | LUB | mRNA | TMEM26_m | -0.02075 |
| RLN2    | LUA | mRNA | TMEM26_m | -0.15228 |
|         | LUB | mRNA | TMEM26_m | -0.15174 |
| RMND1   | LUA | mRNA | TMEM26_m | -0.08257 |
|         | LUB | mRNA | TMEM26_m | -0.07566 |
| S100A11 | LUA | mRNA | GSR_m    | -0.37756 |
|         | LUB | mRNA | GSR_m    | -0.34311 |
| SLC15A2 | LUA | mRNA | GSR_m    | -0.03405 |
|         | LUB | mRNA | GSR_m    | -0.03935 |
| SLC1A2  | LUA | mRNA | GSR_m    | 0.386792 |

|         |     |                      |                     |                      |
|---------|-----|----------------------|---------------------|----------------------|
|         | LUB | mRNA                 | GSR_m               | 0.452976             |
| SLC39A6 | LUA | mRNA                 | GSR_m               | 0.81396              |
|         | LUB | mRNA                 | GSR_m               | 0.908434             |
| SLC46A1 | LUA | mRNA                 | GSR_m               | 0.069057             |
|         | LUB | mRNA                 | GSR_m               | 0.075914             |
| SLC4A11 | LUA | mRNA                 | GSR_m               | -0.21268             |
|         | LUB | mRNA                 | GSR_m               | -0.22081             |
| SPEF2   | LUA | mRNA                 | TMEM26_m            | -0.0807              |
|         | LUB | mRNA                 | TMEM26_m            | -0.07274             |
| SRD5A1  | LUA | mRNA                 | GSR_m               | -0.22938             |
|         | LUB | mRNA                 | GSR_m               | -0.18932             |
| SUSD3   | LUA | mRNA                 | TMEM26_m            | -0.22236             |
|         | LUB | mRNA                 | TMEM26_m            | -0.21653             |
| TBC1D9  | LUA | mRNA                 | GSR_m               | 0.297415             |
|         | LUB | mRNA                 | GSR_m               | 0.276464             |
| TMPRSS6 | LUA | mRNA                 | GSR_m               | 0.744515             |
|         | LUB | mRNA                 | GSR_m               | 0.695653             |
| TTC8    | LUA | mRNA                 | TMEM26_m            | -0.00592             |
|         | LUB | mRNA                 | TMEM26_m            | -0.00788             |
| UGCG    | LUA | mRNA                 | GSR_m               | 0.414532             |
|         | LUB | mRNA                 | GSR_m               | 0.466043             |
| ULK2    | LUA | mRNA                 | GSR_m               | 0.285455             |
|         | LUB | mRNA                 | GSR_m               | 0.338824             |
| ULK4    | LUA | mRNA                 | TMEM26_m            | -0.09006             |
|         | LUB | mRNA                 | TMEM26_m            | -0.05567             |
| USP30   | LUA | mRNA                 | GSR_m               | 0.005211             |
|         | LUB | mRNA                 | GSR_m               | 0.023441             |
| VAV3    | LUA | mRNA                 | TMEM26_m            | -0.05888             |
|         | LUB | mRNA                 | TMEM26_m            | -0.06213             |
| VPS37B  | LUA | mRNA                 | TMEM26_m            | 0.056093             |
|         | LUB | mRNA                 | TMEM26_m            | 0.064213             |
| WDR19   | LUA | mRNA                 | TMEM26_m            | -0.01747             |
|         | LUB | mRNA                 | TMEM26_m            | -0.01462             |
| WNT3    | LUA | mRNA                 | GSR_m               | 0.54746              |
|         | LUB | mRNA                 | GSR_m               | 0.666958             |
| WWP1    | LUA | mRNA                 | TMEM26_m            | -0.09707             |
|         | LUB | mRNA                 | TMEM26_m            | -0.07946             |
| YBX1    | LUA | mRNA                 | GSR_m               | -0.02536             |
|         | LUB | mRNA                 | GSR_m               | -0.07642             |
| ZNF396  | LUA | mRNA                 | GSR_m               | 0.044312             |
|         | LUB | mRNA                 | GSR_m               | 0.002039             |
| ZNF680  | LUA | mRNA                 | TMEM26_m            | -0.05367             |
|         | LUB | mRNA                 | TMEM26_m            | -0.05027             |
| ZNF92   | LUA | mRNA                 | TMEM26_m            | -0.13199             |
|         | LUB | mRNA                 | TMEM26_m            | -0.15909             |
| TLE3    | LUA | mRNA                 | GSR_m               | 0.098267             |
|         | LUB | mRNA                 | GSR_m               | 0.121977             |
| GSR     | LUA | mRNA/<br>Methylation | GSR_m/<br>BECN1_r/* | -1.0737<br>0.100559  |
|         | LUB | mRNA/<br>Methylation | GSR_m/<br>BECN1_r/* | -0.96826<br>0.123594 |
|         | LUA | mRNA                 | TMEM26_m/           | -0.00375/            |

|          |     |                      |                        |                       |
|----------|-----|----------------------|------------------------|-----------------------|
|          |     |                      | GSR_m                  | 0.041959              |
|          | LUB | mRNA                 | GSR_m                  | 0.11108               |
| TMEM26   | LUA | mRNA/<br>methylation | TMEM26_m/<br>BECN1_r   | -1.87465<br>-0.00412  |
|          | LUB | mRNA/<br>methylation | TMEM26_m/<br>BECN1_r/* | -1.98094<br>-0.00558  |
| XBP1     | LUA | mRNA                 | TMEM26_m/<br>GSR_m     | -0.02557/<br>0.020689 |
|          | LUB | mRNA                 | TMEM26_m               | -0.06523              |
| RERG     | LUA | mRNA                 | GSR_m/<br>TMEM26_m     | 0.426999/<br>-0.06607 |
|          | LUB | mRNA                 | GSR_m/<br>TMEM26_m     | 0.597781/<br>-0.07976 |
| C11orf75 | LUA | mRNA                 | TMEM26_m               | 0.01065               |
|          | LUB | mRNA                 | TMEM26_m/<br>GSR_m     | 0.008158/<br>-0.00021 |
| SLC16A6  | LUA | mRNA                 | GSR_m/<br>TMEM26_m     | 0.467657/<br>-0.21827 |
|          | LUB | mRNA                 | GSR_m/<br>TMEM26_m     | 0.417799/<br>-0.20886 |
| LPPR3    | LUA | mRNA                 | GSR_m/<br>TMEM26_m     | 1.233367/<br>-0.41385 |
|          | LUB | mRNA                 | GSR_m/<br>TMEM26_m     | 1.362261/<br>-0.44396 |
| C9orf64  | LUA | mRNA                 | TMEM26_m/<br>GSR_m     | -0.21827/<br>0.467657 |
|          | LUB | mRNA                 | TMEM26_m/<br>GSR_m     | -0.01534/<br>0.23806  |

\* represents that there are other genes associated with marked targets, but the connections have been shown in the table.
