# Supplementary material for: Integrating multiple omics data for the discovery of potential Beclin-1 interactions in breast cancer
Source: Royal Society of Chemistry journal article supplement (doi:10.1039/c6mb00653a), 2017-01-27
Supplement: c6mb00653a2.pdf [file c6mb00653a2.pdf]

Supplementary table 2: The microarray data of Beclin-1 knock down cell (lg fold change)

| Gene name | SiRNA    | Beclin-1 cDNA |
|-----------|----------|---------------|
| EIF4G2    | 0.671381 | -1.26603      |
| MED21     | 0.676847 | -1.37898      |
| BORA      | 0.799468 | -0.61814      |
| ATP6V1A   | 0.791629 | -0.6301       |
| EIF2S1    | 0.783894 | -0.6059       |
| MIB1      | 0.760174 | -0.63666      |
| WDFY3     | 0.755221 | -0.63579      |
| CAPRIN1   | 0.734639 | -0.60754      |
| RIOK3     | 0.737783 | -0.62882      |
| ATP6V1C1  | 0.831335 | -0.62128      |
| NIN       | 0.84372  | -0.65541      |
| HSP90AA4P | 0.867678 | -0.59371      |
| CSE1L     | 1.009251 | -0.58691      |
| CAPZA1    | 0.988505 | -0.62306      |
| CKAP2     | 0.686063 | -0.60219      |
| CUL4B     | 0.696554 | -0.6199       |
| CLTC      | 0.717992 | -0.58615      |
| PIGK      | 0.684476 | -0.66373      |
| HSPD1     | 0.673711 | -0.65302      |
| YME1L1    | 0.670086 | -0.67119      |
| AMD1      | 0.66317  | -0.60542      |
| TNRC6A    | 0.636686 | -0.5914       |
| PRKD3     | 0.619661 | -0.59921      |
| ZNF789    | 0.611605 | -0.60822      |
| MARCH7    | 0.606266 | -0.59154      |
| MIR17HG   | 0.622873 | -0.62754      |
| MIR18A    | 0.622873 | -0.62754      |
| MIR19A    | 0.622873 | -0.62754      |
| MIR19B1   | 0.622873 | -0.62754      |
| MIR20A    | 0.622873 | -0.62754      |
| MIR92A1   | 0.622873 | -0.62754      |
| HSPA13    | 0.706074 | -0.69645      |
| GPD2      | 0.723526 | -0.71397      |
| CLDN12    | 0.724078 | -0.73573      |
| WDHD1     | 0.718372 | -0.74589      |
| GNPNAT1   | 0.639899 | -0.70551      |
| PTPLB     | 0.647207 | -0.71522      |
| TBC1D1    | 0.668771 | -0.72763      |
| HPS3      | 0.659556 | -0.7422       |
| CD46      | 0.641643 | -0.65125      |
| AFF3      | 0.643519 | -0.65982      |
| EGFR      | 0.632442 | -0.67783      |

|           |          |          |
|-----------|----------|----------|
| BCCIP     | 0.626637 | -0.66048 |
| BRIX1     | 0.615143 | -0.66673 |
| HSH2D     | 0.621555 | -0.6746  |
| CEP55     | 0.612826 | -0.70174 |
| CELF2     | 0.599505 | -0.68014 |
| VTA1      | 0.589446 | -0.69151 |
| DIS3      | 0.807451 | -0.71619 |
| MUT       | 0.838774 | -0.7964  |
| SLC6A15   | 0.797727 | -0.80731 |
| ZNHIT6    | 0.785034 | -0.81783 |
| SRP72     | 0.780204 | -0.83831 |
| ORC3      | 0.710062 | -0.80722 |
| MMS22L    | 0.717713 | -0.83905 |
| TRIM37    | 0.735316 | -0.8906  |
| MATR3     | 0.779366 | -0.87501 |
| SNHG4     | 0.779366 | -0.87501 |
| LRPPRC    | 0.665164 | -0.82205 |
| SEPT10    | 0.650194 | -0.8085  |
| EIF3E     | 0.640512 | -0.85777 |
| MSH2      | 0.618794 | -0.85078 |
| SMC1A     | 0.593464 | -0.76006 |
| XIST      | 0.600105 | -0.79131 |
| HSPA4     | 0.653674 | -0.76693 |
| CCNG1     | 0.642391 | -0.78486 |
| DCP2      | 0.628469 | -0.79202 |
| HSPA4L    | 0.924509 | -0.7821  |
| FASTKD2   | 0.932595 | -0.81697 |
| INSIG1    | 0.978502 | -0.84908 |
| SDCBP     | 0.857977 | -1.00274 |
| MLLT3     | 0.657818 | -1.02724 |
| C14orf135 | 0.585868 | -0.97853 |
| CAST      | 0.68373  | -0.9652  |
| PDS5A     | 0.666175 | -0.91709 |
| RNF13     | 0.626637 | -0.94586 |
| POLH      | -0.60505 | 0.836578 |
| ISG20     | -0.68622 | 0.880179 |
| CTSZ      | -0.76354 | 0.800652 |
| FIBIN     | -0.60827 | 0.715476 |
| IQCE      | -0.59237 | 0.669036 |
| PSPC1     | -0.67288 | 0.715359 |
| TCP10L    | -0.68378 | 0.713069 |
| AMACR     | -0.64032 | 0.665645 |
| C14orf149 | -0.66645 | 0.651695 |
| ORD9      | -0.60737 | 0.621457 |

|         |          |          |
|---------|----------|----------|
| AGMAT   | -0.65009 | 0.598573 |
| C7orf55 | -0.66876 | 0.585637 |
| FOS     | -0.89047 | 1.079578 |
| SRCRB4D | -0.86343 | 0.816218 |
| CTGF    | -0.87721 | 0.887418 |
| INHBE   | -0.92234 | 0.859721 |
| ALG9    | -0.78792 | 0.639897 |
| LSM14B  | -0.84691 | 0.718852 |
| SNORA21 | -0.89456 | 0.702171 |
| LMNB1   | -0.91857 | 0.70842  |
| AJUBA   | -0.96603 | 0.639742 |
| ATF5    | -1.02753 | 0.589453 |
| MAGEA11 | -1.12342 | 0.599476 |
| EIF4A2  | -1.12528 | 0.634347 |
| MIR1248 | -1.12528 | 0.634347 |
| SNORA4  | -1.12528 | 0.634347 |
| SNORA63 | -1.12528 | 0.634347 |
| SNORA81 | -1.12528 | 0.634347 |
| SNORD2  | -1.12528 | 0.634347 |
